# Supplementary material for: Structural effect of glyme–Li+ salt solvate ionic liquids on the conformation of poly(ethylene oxide)
Source: Royal Society of Chemistry journal article supplement (doi:10.1039/c6cp00919k), 2016-01-01
Supplement: c6cp00919k1.pdf [file c6cp00919k1.pdf]

### Supporting information file

## Structural effect of glyme-Li salt solvate ionic liquids on the conformation of poly(ethylene oxide)

Zhengfei Chen,<sup>a</sup> Samila McDonald,<sup>a</sup> Paul A. Fitzgerald,<sup>b</sup> Gregory G. Warr,<sup>b</sup> Rob Atkin<sup>a\*</sup>

<sup>a</sup> Priority Research Centre for Advanced Fluids and Interfaces, Newcastle Institute for Energy and Resources, The University of Newcastle, Callaghan, NSW 2308, Australia

<sup>b</sup> School of Chemistry, The University of Sydney, Sydney, NSW 2006 Australia

Table S1. Scattering length densities of polymers and solvents used.

| Sample                   | SLD ( $10^{-6} \text{ \AA}^{-2}$ ) |
|--------------------------|------------------------------------|
| H-PEO                    | 0.68                               |
| d-PEO                    | 6.9                                |
| [Li(G3)]TFSI             | 1.7                                |
| [Li(G4)]BETI             | 1.91                               |
| [Li(G4)]ClO <sub>4</sub> | 1.03                               |

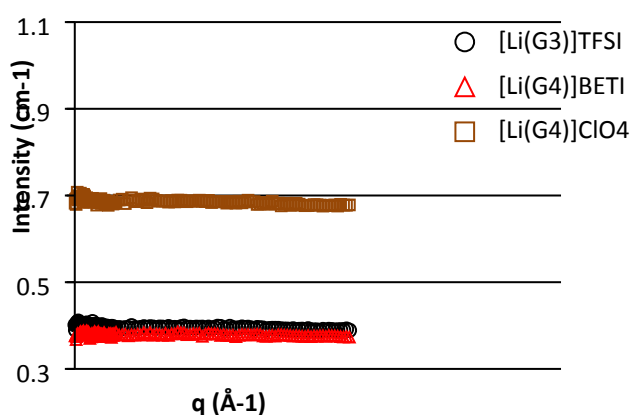

Figure S1. SANS scattering traces of pure solvents.

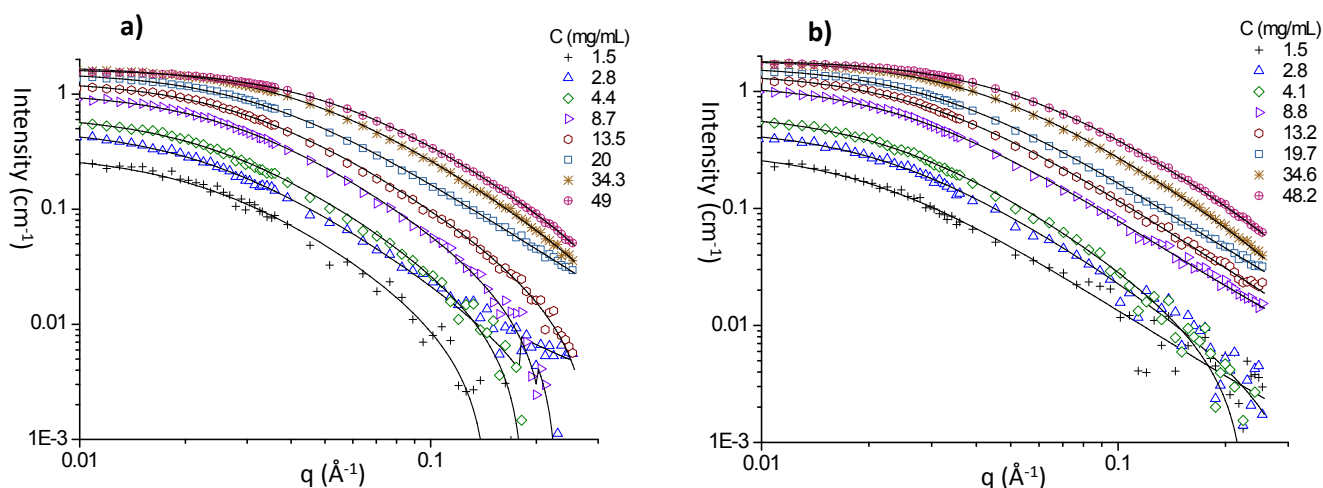

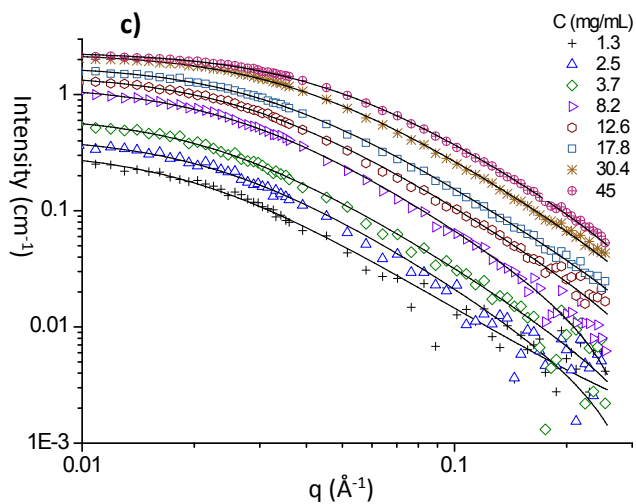

**Figure S2.** SANS intensity for a) d-PEO-[Li(G3)]TFSI, b) d-PEO-[Li(G4)]BETI and c) d-PEO-[Li(G4)]ClO<sub>4</sub> solutions of varying PEO concentration with background being subtracted. Lines are using Ornstein-Zernike formula fits to the data.

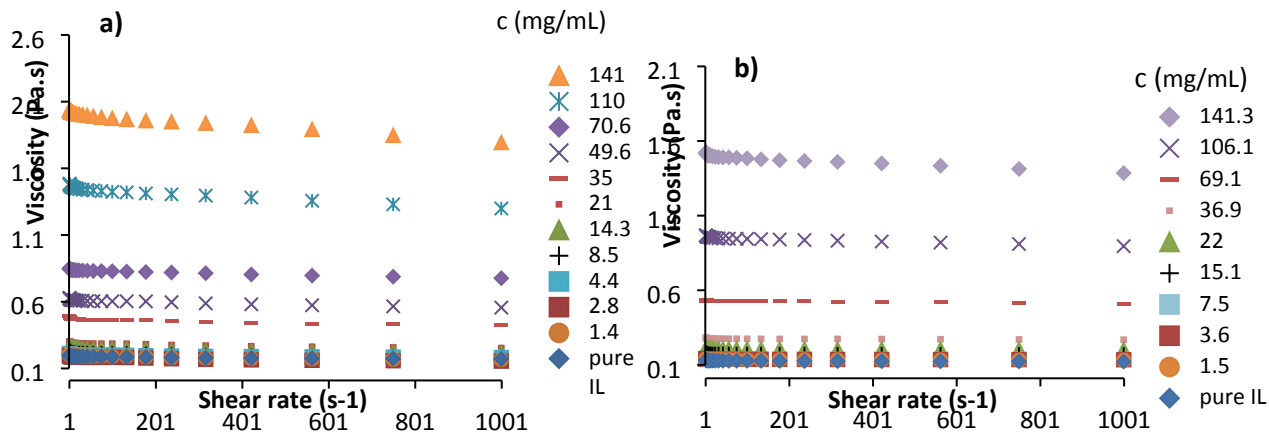

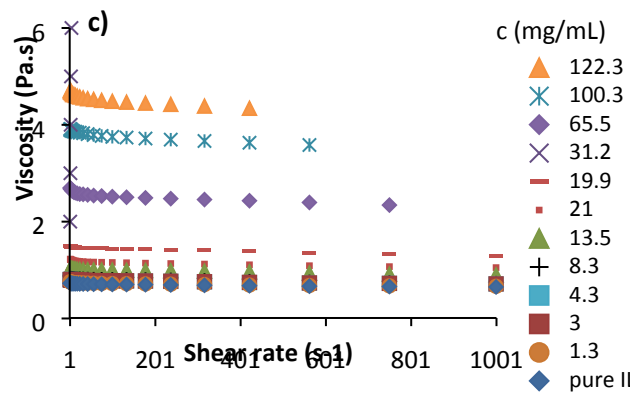

**Figure S3.** Apparent viscosity vs. shear rate for various PEO concentrations in a) PEO-[Li(G3)]TFSI at 25 °C, b) PEO-[Li(G4)]BETI at 30 °C and c) PEO-[Li(G4)]ClO<sub>4</sub> at 25 °C.
